# Supplementary material for: Antibiotic susceptibility of cystic fibrosis lung microbiome members in a multispecies biofilm
Source: PubMed Central journal article supplement (PMC7798459; doi:10.1016/j.bioflm.2020.100031), 2020-06-13
Supplement: mmc1.pdf [file mmc1.pdf]

## **SUPPLEMENTARY INFORMATION**

### **Antibiotic susceptibility of cystic fibrosis lung microbiome members in a multispecies biofilm**

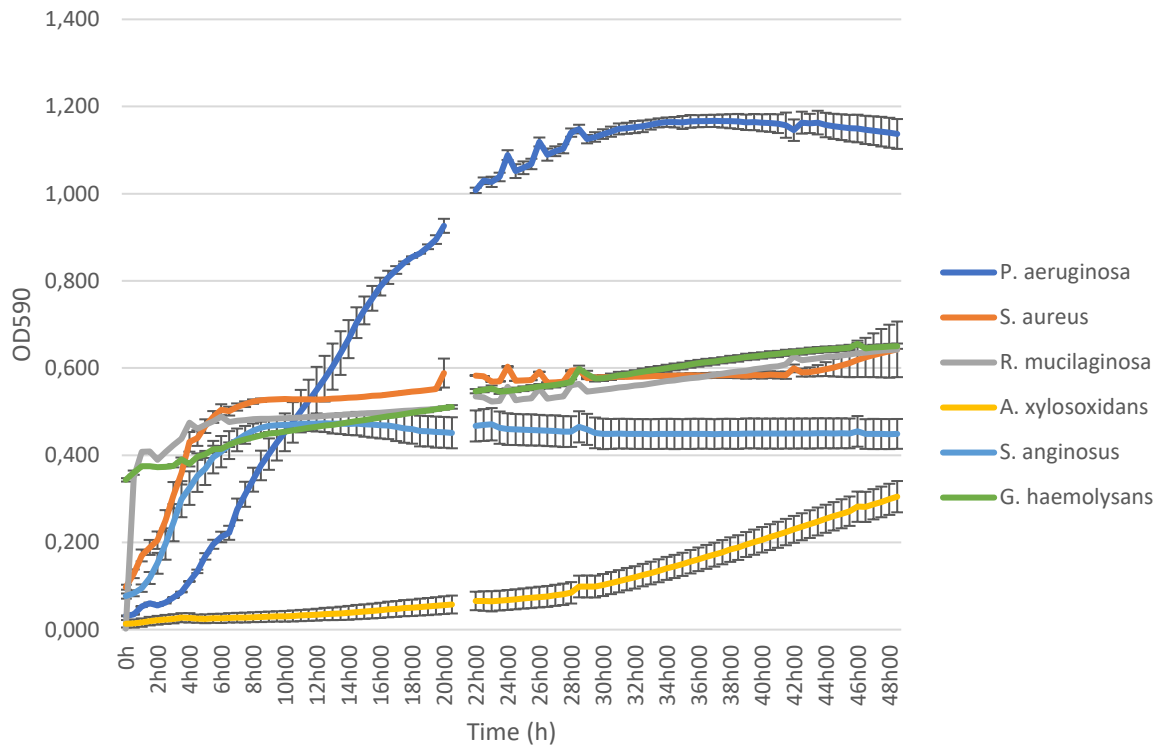

**Supplementary Figure S1.** Growth curves of *P. aeruginosa*, *S. aureus*, *R. mucilaginosa*, *A. xylosoxidans*, *S. anginosus* and *G. haemolysans* in BHI + LYS medium under microaerophilic (5% O<sub>2</sub>) conditions. Graph shows means; error bars indicate standard error; n = 3.

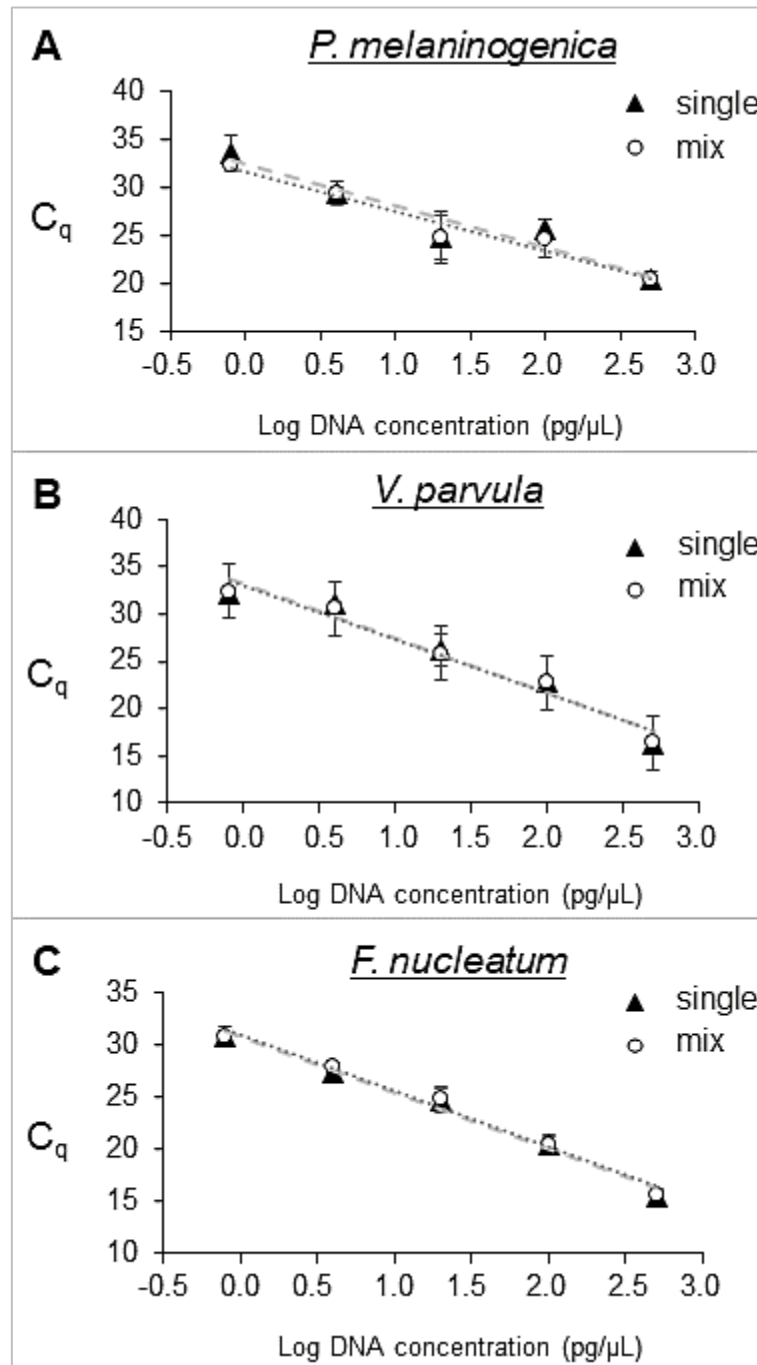

**Supplementary Figure S2. Standard curves to validate qPCR reaction efficiency for (A) *P. melaninogenica*, (B) *V. parvula*, and (C) *F. nucleatum* primers at various (lower) DNA concentrations, in the presence or absence of non-target DNA. Single: only target DNA was present at various concentrations. Mix: non-target DNA of all other bacterial strains (*P. aeruginosa*, *S. aureus*, *S. anginosus*, *A. xylosoxidans*, *R. mucilaginosa*, *G. haemolysans*, and the two non-target anaerobic strains) was added to the same concentrations of target DNA, to confirm that no differences in qPCR reaction efficiency occurred in the presence of non-target DNA. Graphs show means and error bars indicate mean absolute deviations, n = 2.**

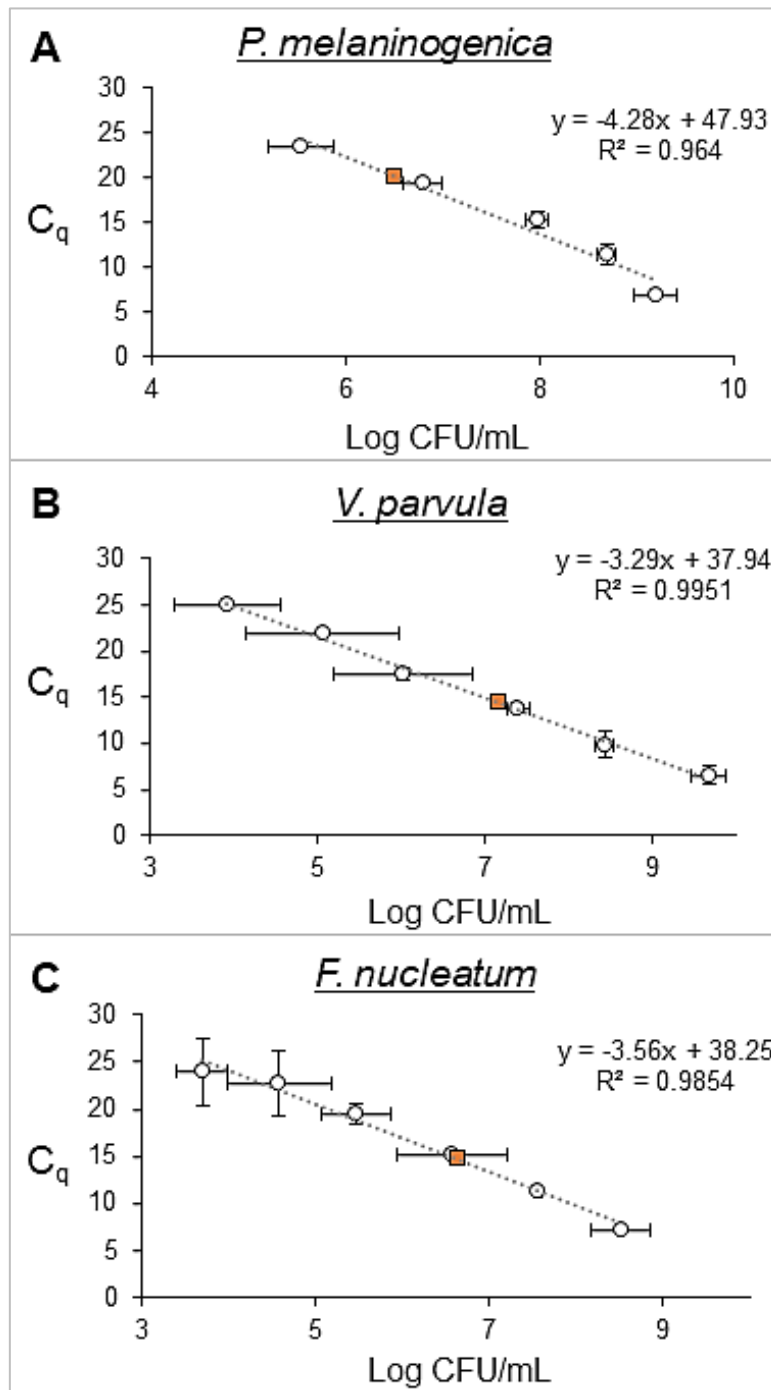

**Supplementary Figure S3. Log CFU/mL versus C<sub>q</sub>-value standard curves for (A) *P. melaninogenica*, (B) *V. parvula*, and (C) *F. nucleatum*.** Log CFU/mL was determined via plating and C<sub>q</sub>-values via qPCR. Orange squares (□) indicate C<sub>q</sub>-values found in the multispecies biofilm samples. Graphs show means and error bars indicate mean absolute deviations, n = 2.
